# Supplementary material
Source: publisher figshare collection journal article supplement (https://sage.figshare.com/ndownloader/files/36009530)
Supplement: Supplementary file 1 [file 36009530]

|  | | **Males** | | | **Females** | | |
| --- | --- | --- | --- | --- | --- | --- | --- |
| **Endpoint** | **Statistic** | **Cambodian** | **Chinese** | **Vietnamese** | **Cambodian** | **Chinese** | **Vietnamese** |
| Adrenal glands (g) | Mean | 0.511 | 0.539 | 0.505 | 0.521 | 0.533 | 0.528 |
| SD | 0.1022 | 0.3015 | 0.1049 | 0.0943 | 0.1060 | 0.1289 |
| N | 282 | 733 | 122 | 270 | 734 | 118 |
| Adrenal glands / Body Weight (%) | Mean | 0.019 | 0.019 | 0.018 | 0.019 | 0.020 | 0.019 |
| SD | 0.0045b | 0.0124c | 0.0038b,c | 0.0035 | 0.0041c | 0.0046c |
| N | 282 | 733 | 122 | 269 | 734 | 118 |
| Adrenal glands / Brain Weight (ratio) | Mean | 0.007 | 0.008 | 0.007 | 0.008 | 0.008 | 0.008 |
| SD | 0.0015 | 0.0038 | 0.0015 | 0.0016 | 0.0018 | 0.0021 |
| N | 282 | 733 | 122 | 270 | 734 | 118 |
| Brain (g) | Mean | 70.099 | 70.099 | 69.775 | 64.414 | 64.870c | 63.456c |
| SD | 5.6434 | 5.4567 | 5.2286 | 5.0183 | 5.2864 | 5.0528 |
| N | 282 | 733 | 122 | 270 | 734 | 118 |
| Brain / Body Weight (%) | Mean | 2.566a,b | 2.474a | 2.439b | 2.421b | 2.427c | 2.256b,c |
| SD | 0.4757 | 0.4311 | 0.3193 | 0.3829 | 0.3297 | 0.2897 |
| N | 282 | 733 | 122 | 269 | 734 | 118 |
| Epididymides (g) | Mean | 0.910 | 1.002 | 1.021 | - | - | - |
| SD | 0.6807 | 0.8072 | 0.8201 | - | - | - |
| N | 228 | 494 | 55 | - | - | - |
| Epididymides / Body Weight (%) | Mean | 0.029 | 0.031 | 0.031 | - | - | - |
| SD | 0.0151 | 0.0166 | 0.0159 | - | - | - |
| N | 228 | 494 | 55 | - | - | - |
| Epididymides / Brain Weight (ratio) | Mean | 0.013 | 0.014 | 0.014 | - | - | - |
| SD | 0.0097 | 0.0112 | 0.0108 | - | - | - |
| N | 228 | 494 | 55 | - | - | - |
| Heart (g) | Mean | 9.876a, b | 10.568a | 10.447b | 9.022a, b | 9.543a, c | 10.180b, c |
| SD | 2.3000 | 2.3141 | 1.8517 | 1.6925 | 1.6651 | 1.7691 |
| N | 282 | 733 | 122 | 270 | 734 | 118 |
| Heart / Body Weight (%) | Mean | 0.349a, b | 0.363a | 0.359b | 0.332a, b | 0.352a | 0.357b |
| SD | 0.0355 | 0.0432 | 0.0364 | 0.0343 | 0.0426 | 0.0428 |
| N | 282 | 733 | 122 | 269 | 734 | 118 |
| Heart / Brain Weight (ratio) | Mean | 0.141a, b | 0.151a | 0.150b | 0.141a, b | 0.148a, c | 0.161b, c |
| SD | 0.0314 | 0.0319 | 0.0245 | 0.0272 | 0.0258 | 0.0270 |
| N | 282 | 733 | 122 | 270 | 734 | 118 |
| Kidneys (g) | Mean | 13.667 | 13.841 | 13.341 | 12.824 | 12.881 | 12.976 |
| SD | 2.7067 | 2.6025 | 1.9407 | 2.0668 | 2.0162 | 1.6956 |
| N | 282 | 741 | 122 | 270 | 734 | 118 |
| Kidneys / Body Weight (%) | Mean | 0.487b | 0.479c | 0.461b, c | 0.474b | 0.477c | 0.459b, c |
| SD | 0.0597 | 0.0638 | 0.0512 | 0.0543 | 0.0576 | 0.0572 |
| N | 282 | 741 | 122 | 269 | 734 | 118 |
| Kidneys / Brain Weight (ratio) | Mean | 0.195 | 0.198 | 0.191 | 0.200 | 0.199 | 0.205 |
| SD | 0.0367 | 0.0361 | 0.0254 | 0.0348 | 0.0315 | 0.0291 |
| N | 282 | 733 | 122 | 270 | 734 | 118 |
| Liver (g) | Mean | 57.282 | 58.088 | 57.569 | 56.589 | 57.078 | 58.299 |
| SD | 12.0940 | 11.2727 | 8.7619 | 10.8660 | 9.4774 | 9.1837 |
| N | 282 | 733 | 122 | 270 | 734 | 118 |
| Liver / Body Weight (%) | Mean | 2.036a, b | 2.000a | 1.988b | 2.087 | 2.105c | 2.046c |
| SD | 0.2395 | 0.2212 | 0.1941 | 0.2609 | 0.2091 | 0.1883 |
| N | 282 | 733 | 122 | 269 | 734 | 118 |
| Liver / Brain Weight (ratio) | Mean | 0.818 | 0.831 | 0.827 | 0.882 | 0.883c | 0.922c |
| SD | 0.1669 | 0.1567 | 0.1220 | 0.1737 | 0.1476 | 0.1430 |
| N | 282 | 733 | 122 | 270 | 734 | 118 |
| Lung (g) | Mean | 19.634a, b | 16.512a, c | 15.078b, c | 19.002a, b | 15.474a | 14.939b |
| SD | 5.2139 | 4.9816 | 2.8773 | 5.4042 | 4.7869 | 2.5821 |
| N | 91 | 184 | 86 | 90 | 185 | 86 |
| Lung / Body Weight (%) | Mean | 0.753a, b | 0.576a, c | 0.513b, c | 0.729a, b | 0.574a, c | 0.524b, c |
| SD | 0.2341 | 0.1487 | 0.0619 | 0.2066 | 0.1760 | 0.0891 |
| N | 91 | 184 | 86 | 90 | 185 | 86 |
| Lung / Brain Weight (ratio) | Mean | 0.284a, b | 0.237a, c | 0.215b, c | 0.302a, b | 0.243a | 0.235b |
| SD | 0.0756 | 0.0735 | 0.0381 | 0.0877 | 0.0799 | 0.0405 |
| N | 91 | 184 | 86 | 90 | 185 | 86 |
| Ovaries (g) | Mean | - | - | - | 0.320 | 0.351 | 0.408 |
| SD | - | - | - | 0.3245 | 0.6528 | 0.2988 |
| N | - | - | - | 266 | 724 | 118 |
| Ovaries / Body Weight (%) | Mean | - | - | - | 0.012 | 0.013 | 0.014 |
| SD | - | - | - | 0.0112 | 0.0227 | 0.0104 |
| N | - | - | - | 265 | 724 | 118 |
| Ovaries / Brain Weight (ratio) | Mean | - | - | - | 0.005 | 0.005 | 0.006 |
| SD | - | - | - | 0.0052 | 0.0102 | 0.0049 |
| N | - | - | - | 266 | 724 | 118 |
| Pancreas (g) | Mean | 3.173a | 5.144a | 3.965 | 3.391a | 4.618a | 4.336 |
| SD | 1.0184 | 1.5510 | 1.5381 | 0.7652 | 1.2961 | 0.7230 |
| N | 6 | 27 | 5 | 6 | 27 | 4 |
| Pancreas / Body Weight (%) | Mean | 0.138 | 0.158 | 0.149 | 0.168 | 0.161 | 0.174 |
| SD | 0.0367 | 0.0434 | 0.0562 | 0.0407 | 0.0456 | 0.0255 |
| N | 6 | 27 | 5 | 6 | 27 | 4 |
| Pancreas / Brain Weight (ratio) | Mean | 0.049a | 0.070a | 0.061 | 0.056 | 0.069 | 0.065 |
| SD | 0.0139 | 0.0208 | 0.0236 | 0.0148 | 0.0207 | 0.0083 |
| N | 6 | 27 | 5 | 6 | 27 | 4 |
| Pituitary gland (g) | Mean | 0.051 | 0.050 | 0.050 | 0.057 | 0.056 | 0.058 |
| SD | 0.0184 | 0.0172 | 0.0169 | 0.0217 | 0.0464 | 0.0163 |
| N | 276 | 702 | 122 | 264 | 703 | 118 |
| Pituitary gland / Body Weight (%) | Mean | 0.002 | 0.002 | 0.002 | 0.002 | 0.002 | 0.002 |
| SD | 0.0006 | 0.0006 | 0.0006 | 0.0008 | 0.0015 | 0.0006 |
| N | 276 | 702 | 122 | 263 | 703 | 118 |
| Pituitary gland / Brain Weight (ratio) | Mean | 0.001 | 0.001 | 0.001 | 0.001 | 0.001 | 0.001 |
| SD | 0.0003 | 0.0002 | 0.0002 | 0.0003 | 0.0007 | 0.0003 |
| N | 276 | 702 | 122 | 264 | 703 | 118 |
| Prostate gland (g) | Mean | 0.576 | 0.583 | 0.506 | - | - | - |
| SD | 0.5160 | 0.4938 | 0.3716 | - | - | - |
| N | 272 | 664 | 107 | - | - | - |
| Prostate gland / Body Weight (%) | Mean | 0.019 | 0.019 | 0.017 | - | - | - |
| SD | 0.0130 | 0.0114 | 0.0095 | - | - | - |
| N | 272 | 664 | 107 | - | - | - |
| Prostate gland / Brain Weight (ratio) | Mean | 0.008 | 0.008 | 0.007 | - | - | - |
| SD | 0.0072 | 0.0068 | 0.0052 | - | - | - |
| N | 272 | 664 | 107 | - | - | - |
| Salivary Gland, Mandibular (g) | Mean | 0.925a | 1.052a, c | 0.933c | 0.872a, b | 1.050a | 0.972b |
| SD | 0.2413 | 0.3950 | 0.2649 | 0.2210 | 0.3531 | 0.2524 |
| N | 69 | 164 | 78 | 68 | 165 | 75 |
| Salivary Gland, Mandibular / Body Weight (%) | Mean | 0.033 | 0.036c | 0.033c | 0.032a, b | 0.039a, c | 0.035b, c |
| SD | 0.0083 | 0.0130 | 0.0087 | 0.0071 | 0.0128 | 0.0084 |
| N | 69 | 164 | 78 | 68 | 165 | 75 |
| Salivary Gland, Mandibular / Brain Weight (ratio) | Mean | 0.013a | 0.015a, c | 0.013c | 0.014a, b | 0.016a | 0.015b |
| SD | 0.0035 | 0.0059 | 0.0037 | 0.0039 | 0.0054 | 0.0038 |
| N | 69 | 164 | 78 | 68 | 165 | 75 |
| Seminal vesicles (g) | Mean | 0.726 | 1.810 | 1.335 | - | - | - |
| SD | 0.3890 | 1.9285 | 0.9360 | - | - | - |
| N | 5 | 19 | 5 | - | - | - |
| Seminal vesicles / Body Weight (%) | Mean | 0.026 | 0.054 | 0.041 | - | - | - |
| SD | 0.0088 | 0.0489 | 0.0268 | - | - | - |
| N | 5 | 19 | 5 | - | - | - |
| Seminal vesicles / Brain Weight (ratio) | Mean | 0.010 | 0.025 | 0.018 | - | - | - |
| SD | 0.0053 | 0.0256 | 0.0122 | - | - | - |
| N | 5 | 19 | 5 | - | - | - |
| Spleen (g) | Mean | 3.973 | 3.863 | 3.716 | 3.567a, b | 3.320a, c | 3.103b, c |
| SD | 1.3900 | 1.5722 | 1.2125 | 1.0578 | 1.1512 | 0.8332 |
| N | 282 | 724 | 122 | 270 | 726 | 118 |
| Spleen / Body Weight (%) | Mean | 0.140a, b | 0.132a | 0.128b | 0.132a, b | 0.123a, c | 0.110b, c |
| SD | 0.0377 | 0.0472 | 0.0392 | 0.0364 | 0.0389 | 0.0296 |
| N | 282 | 724 | 122 | 269 | 726 | 118 |
| Spleen / Brain Weight (ratio) | Mean | 0.057 | 0.055 | 0.053 | 0.056a, b | 0.051a | 0.049b |
| SD | 0.0188 | 0.0228 | 0.0166 | 0.0163 | 0.0174 | 0.0129 |
| N | 282 | 724 | 122 | 270 | 726 | 118 |
| Testes (g) | Mean | 2.182 | 2.604 | 1.899 | - | - | - |
| SD | 3.5881 | 4.0814 | 3.2646 | - | - | - |
| N | 282 | 733 | 122 | - | - | - |
| Testes / Body Weight (%) | Mean | 0.066 | 0.077 | 0.059 | - | - | - |
| SD | 0.0822 | 0.0901 | 0.0652 | - | - | - |
| N | 282 | 733 | 122 | - | - | - |
| Testes / Brain Weight (ratio) | Mean | 0.031 | 0.037 | 0.027 | - | - | - |
| SD | 0.0510 | 0.0568 | 0.0434 | - | - | - |
| N | 282 | 733 | 122 | - | - | - |
| Thymus (g) | Mean | 3.832a | 3.483a, c | 4.138c | 2.644 | 2.495c | 2.931c |
| SD | 1.7700 | 1.5504 | 1.6766 | 1.1574 | 1.1570 | 1.3788 |
| N | 282 | 719 | 122 | 270 | 721 | 118 |
| Thymus / Body Weight (%) | Mean | 0.140a | 0.121a, c | 0.143c | 0.099a | 0.092a, c | 0.104c |
| SD | 0.0650 | 0.0524 | 0.0575 | 0.0447 | 0.0411 | 0.0489 |
| N | 282 | 719 | 122 | 269 | 721 | 118 |
| Thymus / Brain Weight (ratio) | Mean | 0.055a, b | 0.050a, c | 0.059b, c | 0.041a, b | 0.038a, c | 0.046b, c |
| SD | 0.0243 | 0.0221 | 0.0244 | 0.0182 | 0.0175 | 0.0217 |
| N | 282 | 719 | 122 | 270 | 721 | 118 |
| Thyroid/parathyroid glands (g) | Mean | 0.373a | 0.406a | 0.401 | 0.388 | 0.392 | 0.383 |
| SD | 0.1517 | 0.1528 | 0.1596 | 0.1354 | 0.1846 | 0.1208 |
| N | 282 | 730 | 122 | 270 | 731 | 118 |
| Thyroid/parathyroid glands / Body Weight (%) | Mean | 0.013a | 0.014a | 0.014 | 0.014 | 0.014c | 0.013c |
| SD | 0.0045 | 0.0048 | 0.0059 | 0.0046 | 0.0056 | 0.0039 |
| N | 282 | 730 | 122 | 269 | 731 | 118 |
| Thyroid/parathyroid glands / Brain Weight (ratio) | Mean | 0.005a | 0.006a | 0.006 | 0.006 | 0.006 | 0.006 |
| SD | 0.0020 | 0.0022 | 0.0024 | 0.0022 | 0.0031 | 0.0019 |
| N | 282 | 730 | 122 | 270 | 731 | 118 |
| Uterus with cervix (g) | Mean | - | - | - | 5.817 | 6.130 | 6.039 |
| SD | - | - | - | 2.2142 | 4.7162 | 1.8740 |
| N | - | - | - | 266 | 591 | 104 |
| Uterus with cervix / Body Weight (%) | Mean | - | - | - | 0.213 | 0.223 | 0.213 |
| SD | - | - | - | 0.0753 | 0.1208 | 0.0647 |
| N | - | - | - | 265 | 591 | 104 |
| Uterus with cervix / Brain Weight (ratio) | Mean | - | - | - | 0.091 | 0.095 | 0.096 |
| SD | - | - | - | 0.0347 | 0.0703 | 0.0312 |
| N | - | - | - | 266 | 591 | 104 |
